# Supplementary material for: CD4 and CD8 co-receptors modulate functional avidity of CD1b-restricted T cells
Source: PubMed Central journal article supplement (PMC8748927; doi:10.1038/s41467-021-27764-w), 2022-01-10
Supplement: 41467_2021_27764_MOESM1_ESM.pdf [file 41467_2021_27764_MOESM1_ESM.pdf]

1  
2

## SUPPLEMENTARY INFORMATION

| Cohort | ID        | IGRA Result | TST Result | Age | Sex |
|--------|-----------|-------------|------------|-----|-----|
| SAC    | SAC1011   | N/A         | N/A        | N/A | N/A |
| SAC    | SAC212671 | N/A         | N/A        | N/A | N/A |
| SAC    | SAC218703 | N/A         | N/A        | N/A | N/A |
| SAC    | SAC246764 | N/A         | N/A        | N/A | N/A |
| SAC    | SAC283958 | N/A         | N/A        | N/A | N/A |
| ACS    | 01-0676   | Negative    | 0          | 15  | M   |
| ACS    | 11-0116   | Negative    | 0          | 14  | F   |
| ACS    | 11-0117   | Negative    | 0          | 14  | M   |
| ACS    | 11-0178   | Negative    | 0          | 13  | F   |
| ACS    | 01-0678   | Negative    | 0          | 15  | M   |
| ACS    | 03-0548   | Positive    | 15.1       | 12  | M   |
| ACS    | 09-0210   | Positive    | 17         | 14  | M   |
| ACS    | 11-0097   | Positive    | 12         | 18  | M   |
| ACS    | 03-0707   | Positive    | 13         | 15  | M   |
| ACS    | 01-0774   | Positive    | 15         | 12  | F   |

3  
4  
5  
6  
7  
8  
9  
10  
11  
12  
13

**Supplementary Table 1. Human samples used for ex vivo analysis of SGL-specific T cells.** Human samples used in this study are listed by cohort of origin and participant identifier (ID). Seattle Assay Controls (SAC) are healthy donors from Seattle, WA, that were enrolled through the HIV Vaccine Trials Network (HVTN). The Adolescent Cohort Study (ACS) is composed of M.tb-infected or M.tb-uninfected adolescents from South Africa. Interferon- $\gamma$  release assay (IGRA) and tuberculin skin test (TST) results are listed and concordantly positive or negative<sup>1</sup>. TST induration is reported here in mm. Age reflects the age at last birthday at the time the sample was collected. Sex is self-reported.

| Specificity                   | Purpose                             | Fluorochrome | Clone    | Supplier          | Dilution |
|-------------------------------|-------------------------------------|--------------|----------|-------------------|----------|
| CD3                           | Lineage                             | BUV395       | UCHT1    | BD Biosciences    | 1:50     |
| CD4                           | Lineage                             | APC H7       | 13B8.2   | BD Biosciences    | 1:50     |
| CD8 $\beta$                   | Lineage                             | BB700        | 2ST8.5H7 | BD Biosciences    | 1:10     |
| CD45RA                        | Memory                              | BUV737       | HI100    | BD Biosciences    | 1:500    |
| CCR7                          | Memory                              | BV711        | 150503   | BD Biosciences    | 1:100    |
| Pan- $\gamma\delta$           | $\gamma\delta$ T cells              | PE-Vio770    | 11F2     | Miltenyi Biotec   | 1:50     |
| V $\delta$ 2                  | V $\gamma$ 9 $\delta$ 2 T cells     | AF700        | B6       | BioLegend         | 1:100    |
| TRAV1-2                       | TCR Identification                  | BV605        | 3C10     | BioLegend         | 1:25     |
| CD14                          | Exclusion                           | V785         | M5E2     | BioLegend         | 1:50     |
| CD19                          | Exclusion                           | V785         | SJ25C1   | BioLegend         | 1:50     |
| Fixable Green Dead Cell Stain | Viability                           | FITC         | N/A      | Life Technologies | 1:1000   |
| CD1b-SGL                      | M.tb lipid antigen-specific T cells | ECD          | N/A      | Custom            | 1:25     |
| CD1b-SGL                      | M.tb lipid antigen-specific T cells | PE           | N/A      | Custom            | 1:25     |
| CD1b-Mock                     | Exclusion                           | V510         | N/A      | Custom            | 1:25     |

14  
15  
16  
17  
18  
19

**Supplementary Table 2. Flow cytometry panel used for *ex vivo* identification of SGL-specific T cells.**

| V Gene   | Antigen | Tetramer-Positive |          | Bulk T cells |          | P-value |
|----------|---------|-------------------|----------|--------------|----------|---------|
|          |         | Positive          | Negative | Positive     | Negative |         |
| TRAV1-2  | GMM     | 10                | 86       | 7438         | 249848   | 0.0005  |
| TRAV8-6  | SGL     | 6                 | 121      | 5428         | 251858   | 0.053   |
| TRAV13-2 | SGL     | 2                 | 125      | 2514         | 254772   | 0.35    |
| TRAV21   | SGL     | 8                 | 119      | 7394         | 249892   | 0.031   |
| TRAV19   | SGL     | 8                 | 119      | 10745        | 246541   | 0.26    |

20  
21  
22  
23  
24  
25  
26  
27  
28  
29  
30  
31

**Supplementary Table 3. Enrichment of V Genes Among SGL-CD1b and GMM-CD1b tetramer-sorted cells.** The count of recovered TCRs using the specified V gene is reported from both patients studied, from GMM-CD1b or SGL-CD1b tetramer-sorted cells (TCRs from GMM-CD1b sorted cells = 96, TCRs from SGL-CD1b sorted cells = 127). IMGT nomenclature is used for variable (V) gene identification. Bulk T cell counts are reported as the sum of the templates from both patients that use the specified V gene using previously published ImmunoSEQ data from the same patients studied here<sup>2</sup>. Template counts were used to populate a 2x2 contingency table and unadjusted p-values resulting from a Fisher's exact test are shown.

| Feature | p-value      | Adjusted p-value |
|---------|--------------|------------------|
| BCL6    | 0.0008633322 | 0.01812998       |
| CTLA4   | 0.0774295439 | 0.23228863       |
| EOMES   | 0.0157129218 | 0.08249284       |
| FOXP3   | 0.0895233478 | 0.23499879       |
| GATA3   | 0.6855045639 | 0.89972474       |
| GZMB    | 0.2702441799 | 0.43654829       |
| IFNG    | 0.0412465963 | 0.17323570       |
| IL10    | 0.4903846154 | 0.73557692       |
| IL12A   | 0.0543482280 | 0.19021880       |
| IL13    | 1.0000000000 | 1.00000000       |
| IL17A   | 1.0000000000 | 1.00000000       |
| IL2     | 1.0000000000 | 1.00000000       |
| MKI67   | 0.1457037759 | 0.33997548       |
| PDCD1   | 1.0000000000 | 1.00000000       |
| PRF1    | 0.0060037481 | 0.04202624       |
| RORC    | 0.5617481485 | 0.78644741       |
| RUNX1   | 0.7755665553 | 0.95805280       |
| RUNX3   | 0.2600593808 | 0.43654829       |
| TBET    | 0.0026350284 | 0.02766780       |
| TGFB1   | 0.2380507842 | 0.43654829       |
| TNF     | 0.1649880906 | 0.34647499       |

32

33

34

35

36

**Supplementary Table 4. Differentially expressed genes among CD4 and CD8 CD1b-restricted T cells.** P-values for each gene are summarized here P-values were calculated for each gene (Feature) between CD4 and CD8 T cells using following a Fisher's Exact Test (p-value) and Benjamini-Hochberg correction (adjusted p-value) (n = 23 features).

| Gene      | Reaction 1: Forward Primer | Reaction 1: Reverse Primer  |
|-----------|----------------------------|-----------------------------|
| PDCD1     | TGACAGAGAGAAGGGCAGAAGT     | GAAATCCAGCTCCCCATAGTC       |
| CTLA4     | CTTGCCTTGGATTTTACGCGG      | TAGGTTGCCGCACAGACTTC        |
| MKI67     | CAAGACCCCAAGTGAAGGAGC      | CTGGGCGTTTTTGTACGT          |
| EOMES     | TGTTTCGTAGAGGTGGTGCTG      | ATGCAGTCGGGGTTGGTATT        |
| CD4       | CCTCCCCTAAGCTGATGCTG       | CGGCACCTGACACAGAAGAA        |
| CD8A      | AAATGCGAAATCAGGCTCCG       | ATGATGGAGTTGCTCAGGGC        |
| GATA3     | GACGCGGCGCAGTACCCGCT       | GGAGAAGGGGCTGAGATTCCAG      |
| TBET      | GCCTGTACGTCCACCCGGACT      | CTGGGTTTCTTGAAAGTAAAGATAT   |
| FOXP3     | GGCTCCTGCTGCATCGTAGCTGCT   | GTCCGCTGCTTCTCTGGAGCCT      |
| RORC      | CCCGGGAGGAAGTGACTGGCTA     | CCATGCCACCGTATTTGCCTTCAA    |
| RUNX1     | CCGCAGCATGGTGGAGGTGCT      | GGTCATTAATCTTGCAACCTGGTT    |
| RUNX3     | GCGCTCGATGGTGGACGTGCT      | CGTTGAACCTGGCCACCTGGTT      |
| BCL6      | GCCAAACCAGAGGGGCCTGAG      | GAGAGCCGCAGGACGTGCACTT      |
| IL2       | CTCACATTTAAGTTTTACATGCCCAA | GACAAAAGGTAATCCATCTGTTTCCAG |
| IL10      | CCAGTTTTACCTGGAGGAGGTGA    | GTAGGCTTCTATGTAGTTGATGAAGA  |
| IL12A     | GGGAGTTGCCTGGCCTCCAGAA     | CGGTTCTTCAAGGGAGGATTTTTGT   |
| IL13      | CCCAGAACCAGAAGGCTCCGCT     | CCCTCGCGAAAAAGTTTCTTTAAAT   |
| IL17A     | GACAAGAACTTCCCCCGGACTG     | GGACCAGGATCTCTTGCTGGAT      |
| IFNG      | GGCTTTTTCAGCTCTGCATCGTTTT  | GGATGCTCTGGTCATCTTTAAAGTT   |
| TNFA      | CATGATCCGGGACGTGGAGCT      | GGGCTACAGGCTTGCACTCG        |
| TGFB      | GCATATATATGTTCTTCAACACATCA | CCCTCCACGGCTCAACCACT        |
| PERFORIN  | GTGTCTGTGGCCGGCTCACAC      | CCGATATGCGGCCACCCAGCT       |
| GRANZYMEB | GGGAAGCTCCATAAATGTCACCTT   | GTTTTCCAGGGGGGCGCTCT        |

37

38

**Supplementary Table 5. Gene-specific primers used for transcriptional profiling reaction 1.**

39

| GENE  | Reaction 2: Forward Primer                        | Reaction 2: Reverse Primer                           |
|-------|---------------------------------------------------|------------------------------------------------------|
| PDCD1 | CCAGGGTTTTCCAGTCACGACA<br>GGGTGACAGAGAGAAGGGCAGA  | AGCGGATAACAATTTACACAGGACGG<br>TGCGCCTGGCTCCTATTG     |
| CTLA4 | CCAGGGTTTTCCAGTCACGACT<br>GCCTTGATTTCCAGCGGCAC    | AGCGGATAACAATTTACACAGGACGG<br>ACCTCAGTGGCTTTGCC      |
| MKI67 | CCAGGGTTTTCCAGTCACGACC<br>CCCAGTGAAGGAGCAACCG     | AGCGGATAACAATTTACACAGGAAAG<br>GGAGGGCTTGCAGAGCAT     |
| EOMES | CCAGGGTTTTCCAGTCACGACT<br>GACCTGTGGCAAAGCCGAC     | AGCGGATAACAATTTACACAGGAGCA<br>GTCGGGGTTGGTATTTGTG    |
| CD4   | CCAGGGTTTTCCAGTCACGACT<br>CTCGAAGCGGGAGAAGGCG     | AGCGGATAACAATTTACACAGGAAGC<br>CCAATGAAAAGCAGGAGGC    |
| CD8A  | CCAGGGTTTTCCAGTCACGACC<br>TTCGAGCCAAGCAGCGTCC     | AGCGGATAACAATTTACACAGGACTG<br>GAAGAGCCACGAGCAGC      |
| GATA3 | CCAGGGTTTTCCAGTCACGACG<br>CCGGAGGAGGTGGATGTGCTT   | AGCGGATAACAATTTACACAGGAGGG<br>GAGGCGGTGTGGTGGCT      |
| TBET  | CCAGGGTTTTCCAGTCACGACC<br>CCAACACAGGAGCGCACTGG    | AGCGGATAACAATTTACACAGGACGT<br>GTTGGAAGCGTTGCAGGCT    |
| FOXP3 | CCAGGGTTTTCCAGTCACGACG<br>GCAGCCAAGGCCCTGTCGT     | AGCGGATAACAATTTACACAGGACCA<br>GGATGGCCAGCGGATGA      |
| RORC  | CCAGGGTTTTCCAGTCACGACA<br>GAGGAAGTCCATGTGGGAGATGT | AGCGGATAACAATTTACACAGGATCA<br>GCATTGTAGGCCCGGCACATC  |
| RUNX1 | CCAGGGTTTTCCAGTCACGACG<br>CGAGCTGGTGCGCACCGACA    | AGCGGATAACAATTTACACAGGAGGC<br>TGCGGTAGCATTCTCAGCT    |
| RUNX3 | CCAGGGTTTTCCAGTCACGACG<br>GACCACGCAGGCGAGCTCGT    | AGCGGATAACAATTTACACAGGACGG<br>CCGAGGCATTGCGCAGCT     |
| BCL6  | CCAGGGTTTTCCAGTCACGACC<br>CTACACGGCCCCACCTGCCT    | AGCGGATAACAATTTACACAGGAGGG<br>TGCATGTAGAGTGGTGAGTG   |
| IL2   | CCAGGGTTTTCCAGTCACGACC<br>CACAGAAGTAAACATCTTCAGT  | AGCGGATAACAATTTACACAGGATTC<br>TACAATGGTTGCTGTCTCA    |
| IL10  | CCAGGGTTTTCCAGTCACGACC<br>CCAAGCTGAGAACCAAGACCCA  | AGCGGATAACAATTTACACAGGAGTC<br>AAACTCACTCATGGCTTTGTA  |
| IL12A | CCAGGGTTTTCCAGTCACGACA<br>GACCTCTTTATGATGGCCCTGT  | AGCGGATAACAATTTACACAGGAGGC<br>ACAGTCTCACTGTTGAAATTCA |
| IL13  | CCAGGGTTTTCCAGTCACGACG<br>GTATGGAGCATCAACCTGACAG  | AGCGGATAACAATTTACACAGGAGGT<br>CCTTTACAAACTGGGCCAC    |
| IL17A | CCAGGGTTTTCCAGTCACGACC<br>AACCTGAACATCCATAACCGGAA | AGCGGATAACAATTTACACAGGAGGG<br>GACAGAGTTCATGTGGTAGT   |
| IFNG  | CCAGGGTTTTCCAGTCACGACG<br>GGTTCTCTTGGCTGTTACTGC   | AGCGGATAACAATTTACACAGGAGTT<br>TGAAGTAAAAGGAGACAATTTG |
| TNFA  | CCAGGGTTTTCCAGTCACGACG<br>GAGGCGCTCCCCAAGAAGAC    | AGCGGATAACAATTTACACAGGACGA<br>GAAGATGATCTGACTGCCTG   |
| TGFB  | CCAGGGTTTTCCAGTCACGACC<br>CGAGAAGCGGTACCTGAACC    | AGCGGATAACAATTTACACAGGACCG<br>CACAACCTCCGGTGACATCA   |

|           |                                                   |                                                   |
|-----------|---------------------------------------------------|---------------------------------------------------|
| PERFORIN  | CCAGGGTTTTCCAGTCACGACG<br>CCAAC TTTGCAGCCCAGAAGA  | AGCGGATAACAATTTACACAGGAGGG<br>TGCCGTAGTTGGAGATAAG |
| GRANZYMEB | CCAGGGTTTTCCAGTCACGACC<br>CACAATATCAAAGAACAGGAGCC | AGCGGATAACAATTTACACAGGAGCC<br>ACACTGCATGTCTGCCCT  |

40  
41  
42

**Supplementary Table 6. Gene-specific primers used for transcriptional profiling reaction 2.**

Supplementary Figure 1.

**A. 11-0030**

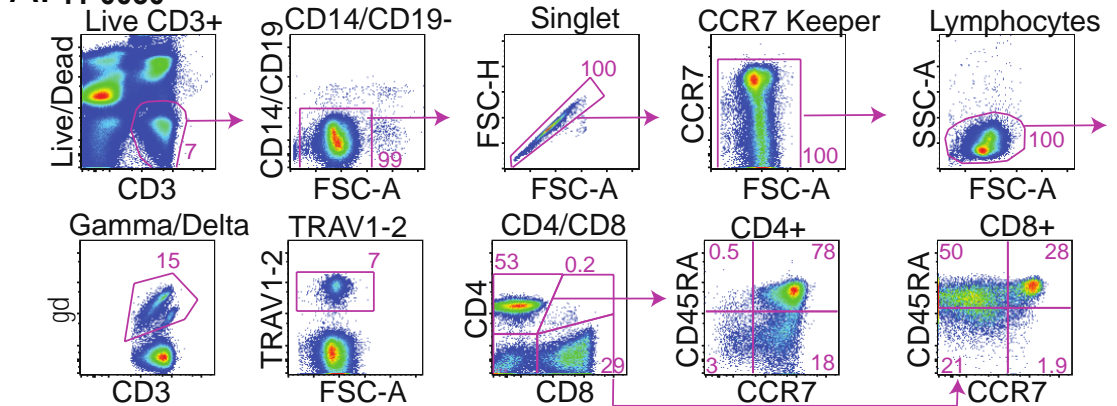

**B. Mock vs. APC Mock vs. ECD**

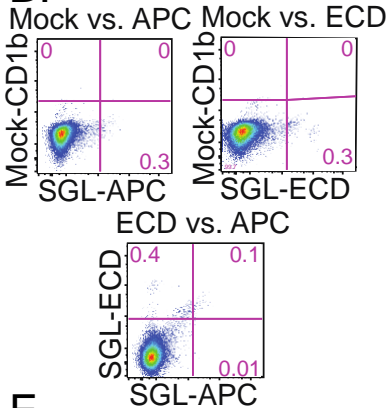

**C. % SGL-CD1b<sup>+</sup> (of CD3)**

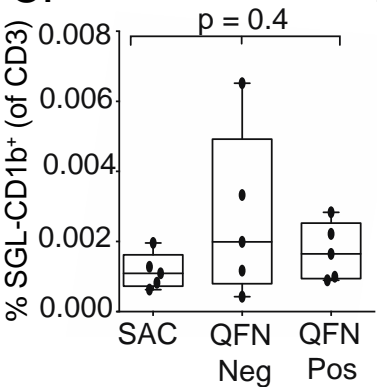

**D. CD3 MFI**

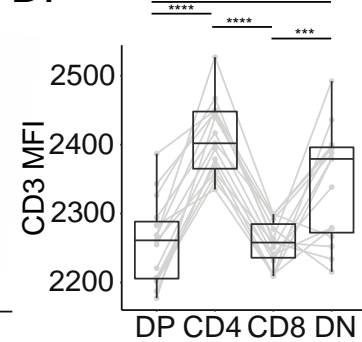

**E. Tetramer FMO Full Stain Full Stain**

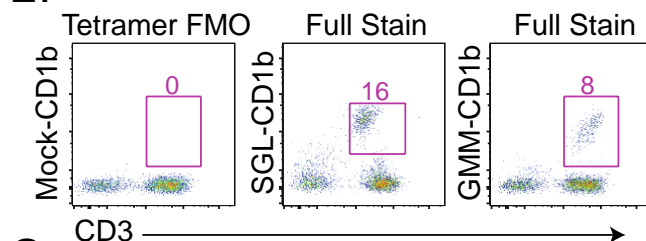

**F. Representative Patient Sort**

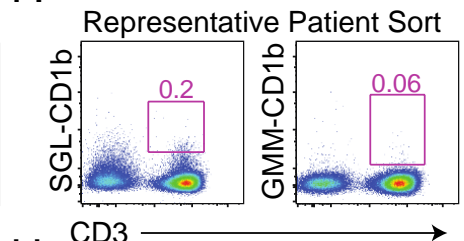

**G. Tetramer FMO Full Stain**

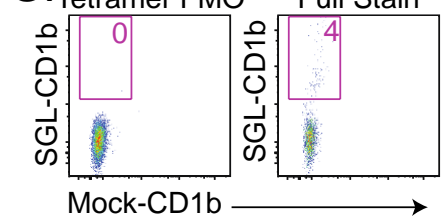

**H. Patient Index Sorts**

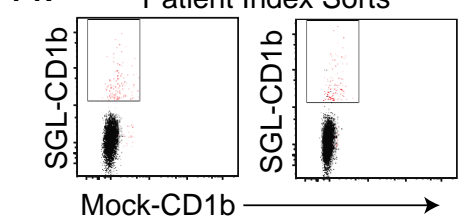

43

44

45

46

47

48

49

50

**Supplementary Figure 1. Gating Strategy for Flow Cytometry and Cell Sorting.** (A) Representative gating strategy for identification of SGL-specific T cells. The gates proceeded from Live and CD3<sup>+</sup> cells to CD14<sup>-</sup> and CD19<sup>-</sup> cells to single cells to a CCR7 keeper gate to lymphocytes by size gating. The CCR7 Keeper Gate is applied to eliminate events stained with dye aggregates, as these can interfere with downstream analysis and gating of rare cell populations<sup>3</sup>. After this point, gates were drawn for  $\gamma\delta$  T cells, TRAV1-2, CD4 and CD8, and CD45RA and CCR7 independently for CD4 and CD8 T cells. (B) Gates were drawn for SGL-CD1b tetramer-positive cells as defined by dual staining with two SGL-CD1b



51 tetramers, and negative for Mock-loaded CD1b tetramer. (C) Boxplots depict the minimum and maximum  
52 as the smallest and largest number of the dataset, excluding outliers, the median and interquartile range  
53 of SGL-CD1b frequency, expressed as a percentage of CD3<sup>+</sup> T cells. Each dot represents the  
54 percentage of SGL-CD1b-specific T cells from one donor. (Kruskal Wallis with Dunn post-test,  $p = 0.4$ ,  $n$   
55  $= 15$ ). (D) Boxplots depict the minimum and maximum as the smallest and largest number of the dataset,  
56 excluding outliers, the median and interquartile range of CD3 MFI of all T cells within each co-receptor  
57 group (double positive (DP), CD4, CD8, and double negative (DN)). Each dot represents the percent of  
58 one sample. The percent of cells in each group was compared to that present in total CD3<sup>+</sup> T cells  
59 (grey). (Two-sided Friedman test with Dunn post-test, \*\*\* =  $p < 0.0001$ , \*\* =  $p = 0.004$ ,  $n = 15$ ). (E) Natural  
60 SGL-CD1b and GMM-CD1b tetramers were incorporated into a multi-parameter flow cytometry assay to  
61 isolate SGL-specific and GMM-specific T cells using fluorescence activated cell sorting (FACS). The  
62 tetramer positive gate was defined by a Mock-loaded CD1b negative control tetramer (left) and a positive  
63 control using SGL- and GMM-specific T cell lines diluted in donor PBMC (middle, right). (F) Natural SGL-  
64 CD1b and GMM-CD1b tetramer positive T cells in the blood were sorted from cryopreserved PBMC  
65 donated by South African adults with new diagnosis of active TB disease ( $n = 2$ ). (G) Gates were drawn  
66 for SGL-CD1b tetramer-positive cells as defined by staining with SGL-CD1b tetramer and negative for  
67 mock-loaded CD1b tetramer. To define these gates, we included an SGL-CD1b fluorescence minus one  
68 (FMO) control (left), and a T cell line positive control (right), to ensure the gates reliably captured cells  
69 that stain with SGL-CD1b tetramer. In this experiment, we included an anti-streptavidin antibody  
70 conjugated to the same fluorochrome as the SGL-CD1b tetramer to increase the tetramer MFI. (H) SGL-  
71 CD1b tetramer positive T cells in the blood were single-cell sorted from cryopreserved PBMC donated  
72 by South African adults with new diagnosis of active TB disease ( $n = 2$ ). This single cell sort was also  
73 indexed, meaning that the MFIs for each channel were saved for each single cell, and this information  
74 was combined with the TCR assignments to assign a co-receptor group to a cell. The negative population  
75 (black) is visualized here using a no tetramer control for each individual (TB-1124, left; TB-1127, right).  
76 The sorted cells (red) are visualized within the sort gate ( $n = 184$  per donor).

77  
78

Supplementary Figure 2.

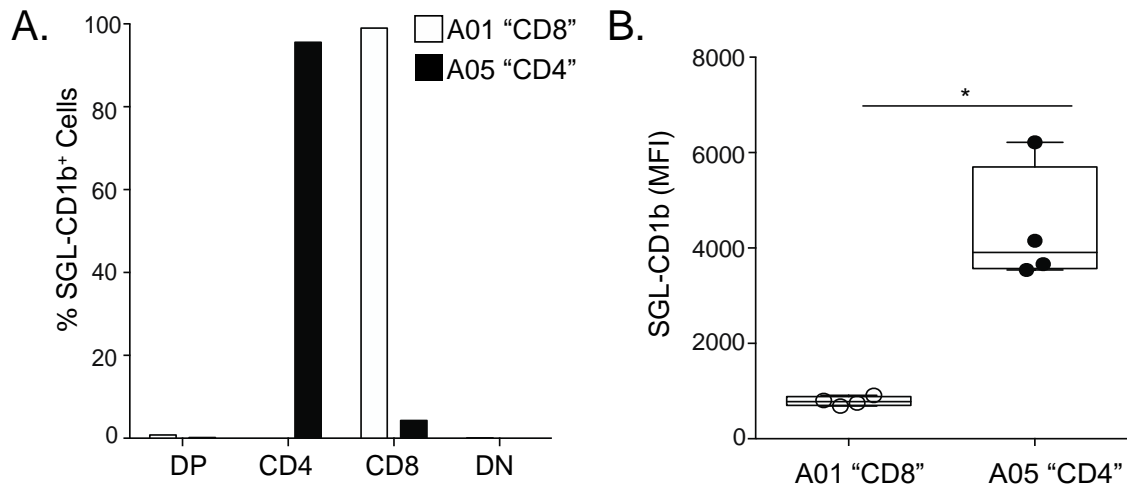

79  
80  
81  
82  
83  
84  
85  
86  
87  
88  
89

**Supplementary Figure 2. Differences in functional avidity between SGL-specific T cell lines.** A01 and A05 T cell lines are specific for SGL and examined by multicolor flow cytometry. (A) Tetramer-positive cells within the A05 T cell line express CD4, and lack CD8 and CD8 expression (black). Tetramer-positive cells within the A01 T cell line express CD8 and CD8, but lack CD4 expression (white). (B) Boxplots depict the minimum and maximum as the smallest and largest number of the dataset, excluding outliers, the median and interquartile range of the SGL-CD1b MFI of A01 (white) and A05 (black) from four independent experiments. (Two-sided Mann-Whitney,  $p = 0.028$ ,  $n = 4$ ).

Supplementary Figure 3.

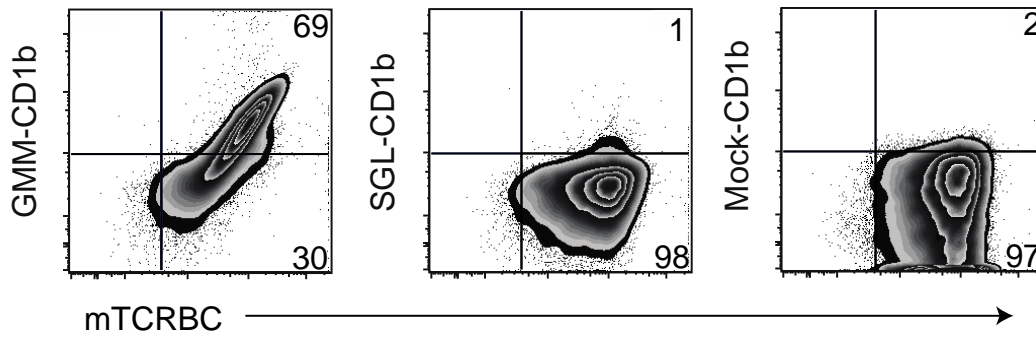

90  
91  
92  
93  
94  
95  
96  
97  
98

**Supplementary Figure 3. Specificity of staining with SGL-CD1b tetramer.** Jurkat cells were transduced with the germline-encoded mycolyl reactive (GEM) TCR (clone 42)<sup>4,5</sup>. Jurkat cells transduced with the GEM TCR stain reliably with glucose monomycolate (GMM)-CD1b tetramer and a murine TCR- $\beta$  chain constant region (mTCRBC) specific antibody (left). These GMM-specific Jurkat cells do not bind SGL-CD1b or mock-loaded CD1b tetramer (middle, right).

Supplementary Figure 4.

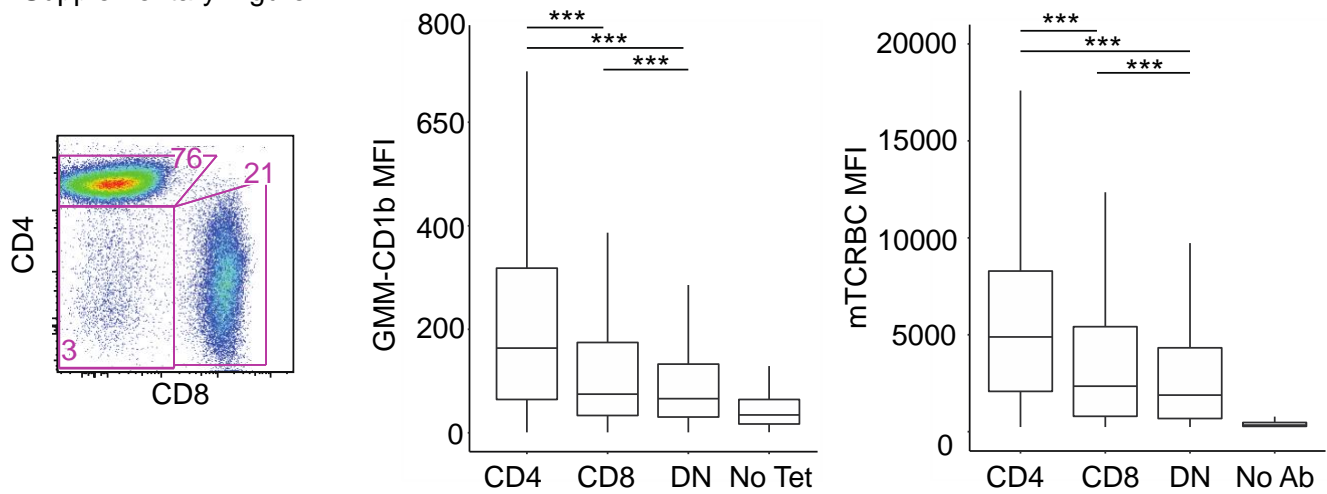

99  
100  
101  
102  
103  
104  
105  
106  
107  
108  
109  
110  
111  
112  
113

**Supplementary Figure 4. Functional avidity of CD4, CD8, and DN T cells transduced with a GMM-specific TCR.** Flow plot depicts the percent of transduced T cells that are CD4, CD8, or DN. Boxplot depicts the median and interquartile range of the GMM-CD1b or mTCRBC MFI of each CD4, CD8, and DN T cell that was transduced with the GEM TCR. The CD4+ transduced T cells stained with GMM-CD1b tetramer with a 1.29-fold higher MFI than the CD8 GMM-specific T cells, and a 2.00-fold higher MFI than DN transduced T cells (Two-way ANOVA, post-hoc Dunn test, \*\*\* =  $p < 0.0001$ ,  $n = 107,935$ ). The CD4+ transduced T cells also stained with the anti-murine TCR- $\beta$  chain constant region (mTCRBC) antibody with a 1.31-fold higher MFI than CD8+ T cells and a 1.53-fold higher MFI than DN T cells ( $p < 0.0001$  and  $p < 0.0001$ , ANOVA with Tukey post-test). The control populations (No Tet and No Ab) were not included in the statistical analysis. Data are representative of two independent rounds of primary T cell transduction with the GEM TCR.

Supplementary Figure 5.

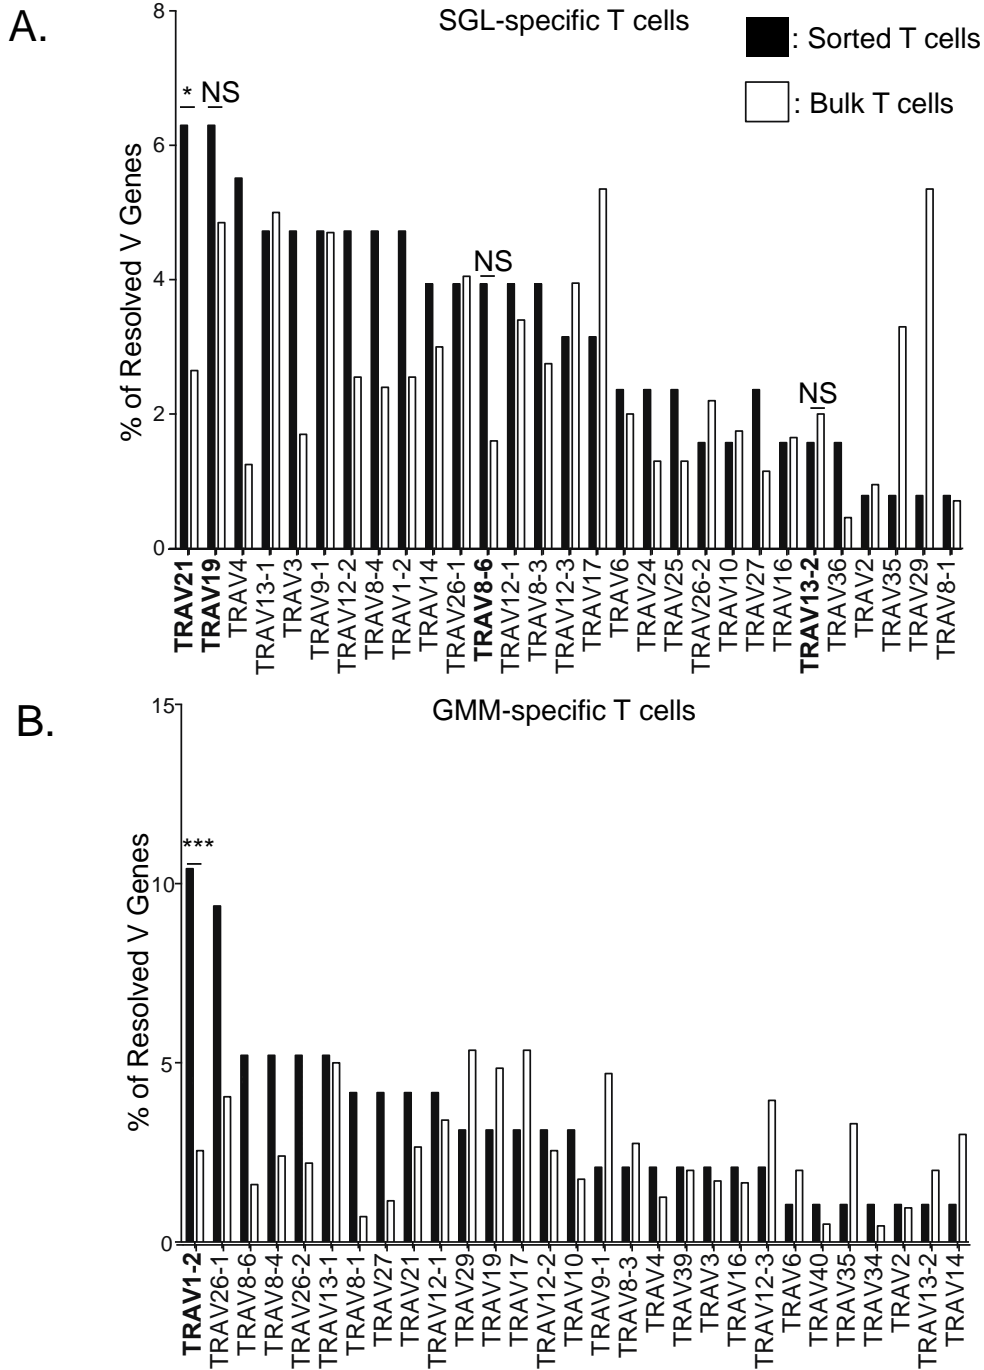

114

115

116 **Supplementary Figure 5. Glycolipid-specific T cells express a diverse TCR repertoire** Variable (V)  
 117 genes from recovered TCRs ordered by decreasing prevalence in the dataset. For tetramer-sorted cells,  
 118 V genes were assigned using VDJFasta using IMGT nomenclature. For bulk T cells, V genes were  
 119 identified using the ImmunoSEQ TCR  $\alpha$  assay (Adaptive Biotechnologies). This data set was previously  
 120 published, and only the two relevant patient samples are analyzed here<sup>2</sup>. Bar plot depicts the percentage  
 121 of total recovered T cell receptor variable (V) genes identified from (A) SGL-CD1b tetramer-sorted cells  
 122 from participant TB-1117 (n = 72) and participant TB-1119 (n = 55) (black), compared to the percentage

123 of bulk T cells that utilize that particular V gene (white). (\* =  $p = 0.031$ , NS =  $p > 0.05$ , Two-sided Fisher's  
124 Exact Test). (B) Bar plot depicts the percentage of total recovered T cell receptor variable (V) genes  
125 identified from GMM-CD1b tetramer-sorted cells from participants TB-1117 ( $n = 30$ ) and TB-1119 ( $n =$   
126 66) (black), compared to the percentage of bulk T cells that utilize that particular V gene (white) (\*\*\*) =  $p$   
127 = 0.0005, Two-sided Fisher's Exact Test).  
128  
129

Supplementary Figure 6.

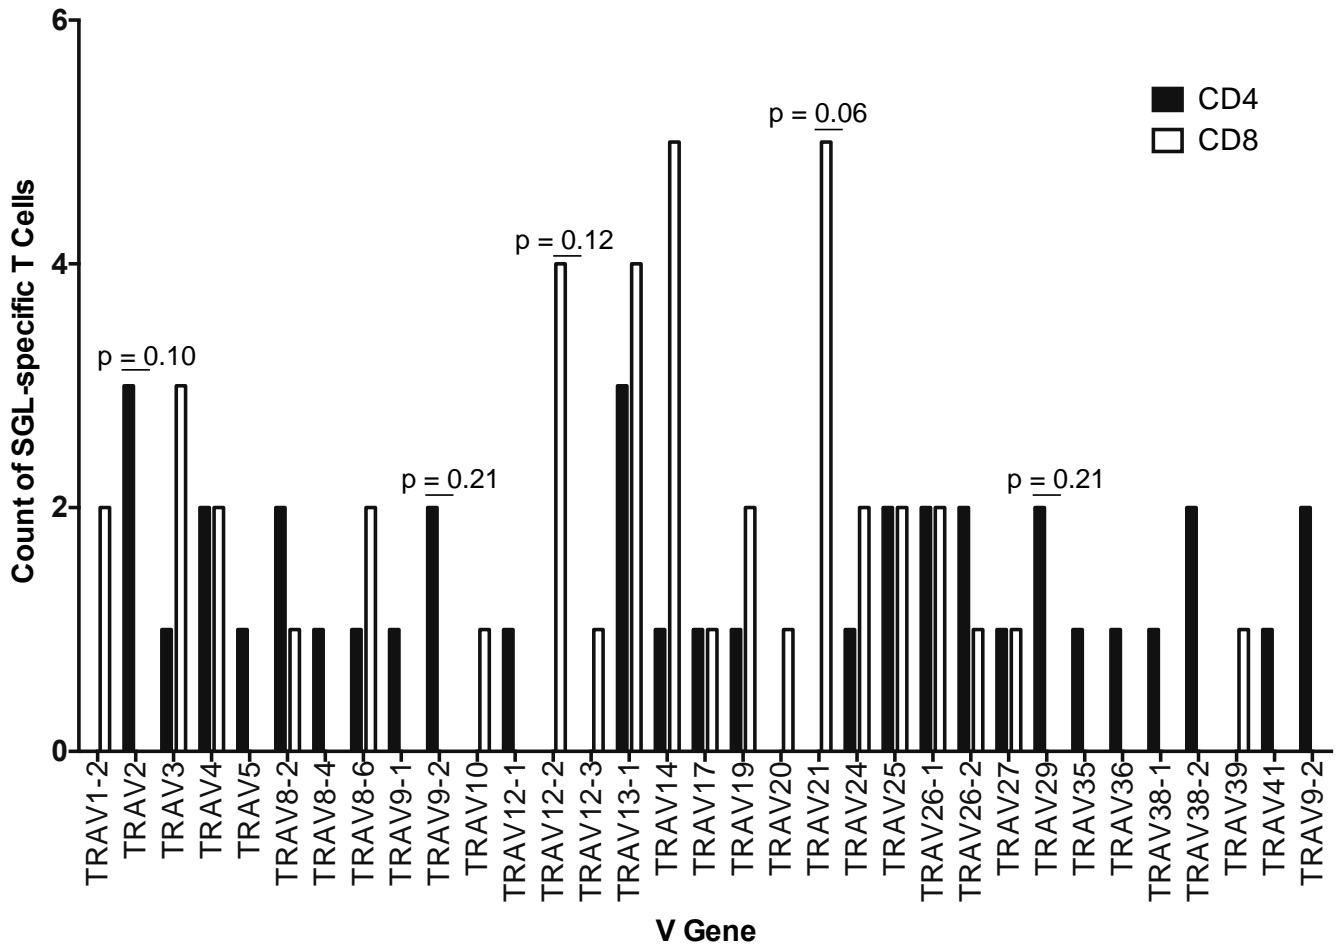

130  
131  
132  
133  
134  
135  
136  
137  
138  
139  
140  
141  
142  
143

**Supplementary Figure 6. TCR- $\alpha$  chain V gene usage by CD4 and CD8 SGL-specific T cells.** Variable (V) genes from recovered CD4 (black) and CD8 (white) TCRs ordered numerically. For tetramer-sorted cells, V genes were assigned using VDJFasta using IMGT nomenclature. Bar plot depicts the percentage of total recovered T cell receptor variable (V) genes identified from SGL-CD1b tetramer-sorted cells from participants TB-1117 (n = 24), TB-1119 (n = 18), TB-1124 (n = 21), and TB-1127 (n = 19). Co-receptor expression was defined by mRNA in participants TB-1117 and TB-1119. In participants TB-1124 and TB-1127, the tetramer-positive cells were index sorted into the 96-well PCR plate, and CD4 and CD8 expression was defined by staining with anti-CD4 and anti-CD8 antibodies. P-values stated are from Two-sided Fisher's exact tests comparing V gene usage in CD4 and CD8 T cells and are unadjusted.

Supplementary Figure 7.

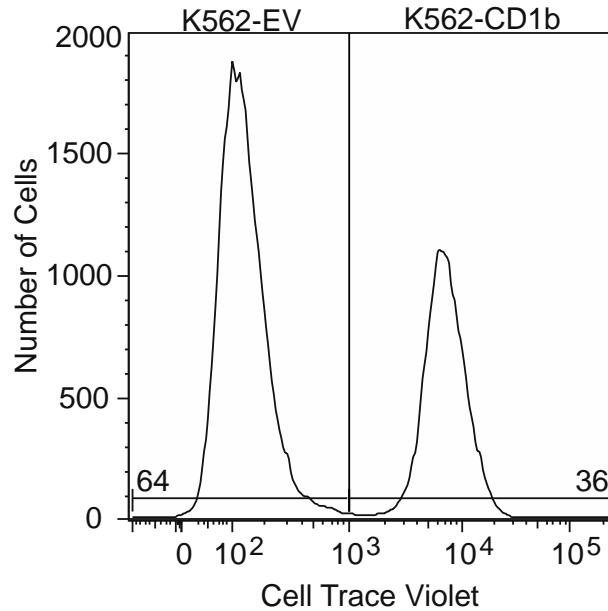

144  
145  
146  
147  
148  
149  
150  
151  
152  
153  
154

**Supplementary Figure 7. Control populations for cytotoxicity assay.** To aid in our cytotoxicity calculation in Figure 5D, we quantified the ratio of K562-CD1b and K562-EV cells in culture. K562-EV and K562-CD1b antigen presenting cells were labeled “low” and “high” with Cell Trace Violet, respectively, and mixed in a 1:1 ratio. These cells were not co-cultured with T cells or lipid antigen. This control enables us to quantify changes in the frequency of K562-CD1b cells that are unrelated to T cell cytotoxic activity to ensure that our “% Cell Death” calculation accurately reflects the reduction of K562-CD1b cells that results from co-culturing with T cells and antigen.



155  
156  
157  
158  
159  
160  
161  
162  
163  
164  
165  
166  
167  
168  
169  
170

## SUPPLEMENTARY REFERENCES

1. Mahomed, H. *et al.* Predictive factors for latent tuberculosis infection among adolescents in a high-burden area in South Africa. *Int. J. Tuberc. Lung Dis.* **15**, 331–6 (2011).
2. DeWitt, W. S. *et al.* A Diverse Lipid Antigen–Specific TCR Repertoire Is Clonally Expanded during Active Tuberculosis. *J. Immunol.* (2018). doi:10.4049/jimmunol.1800186
3. Layton, E. D. *et al.* Validation of a CD1b tetramer assay for studies of human mycobacterial infection or vaccination. *J. Immunol. Methods* **458**, 44–52 (2018).
4. Gras, S. *et al.* T cell receptor recognition of CD1b presenting a mycobacterial glycolipid. *Nat. Commun.* **7**, 13257 (2016).
5. Van Rhijn, I. *et al.* A conserved human T cell population targets mycobacterial antigens presented by CD1b. *Nat. Immunol.* **14**, 706–13 (2013).
