# Supplementary material for: CD4 and CD8 co-receptors modulate functional avidity of CD1b-restricted T cells
Source: PubMed Central journal article supplement (PMC8748927; doi:10.1038/s41467-021-27764-w), 2022-01-10
Supplement: 41467_2021_27764_MOESM3_ESM.pdf [file 41467_2021_27764_MOESM3_ESM.pdf]

## Reporting Summary

Nature Research wishes to improve the reproducibility of the work that we publish. This form provides structure for consistency and transparency in reporting. For further information on Nature Research policies, see our [Editorial Policies](#) and the [Editorial Policy Checklist](#).

### Statistics

For all statistical analyses, confirm that the following items are present in the figure legend, table legend, main text, or Methods section.

n/a Confirmed

- |                                     |                                     |                                                                                                                                                                                                                                                            |
|-------------------------------------|-------------------------------------|------------------------------------------------------------------------------------------------------------------------------------------------------------------------------------------------------------------------------------------------------------|
| <input type="checkbox"/>            | <input checked="" type="checkbox"/> | The exact sample size ( $n$ ) for each experimental group/condition, given as a discrete number and unit of measurement                                                                                                                                    |
| <input type="checkbox"/>            | <input checked="" type="checkbox"/> | A statement on whether measurements were taken from distinct samples or whether the same sample was measured repeatedly                                                                                                                                    |
| <input type="checkbox"/>            | <input checked="" type="checkbox"/> | The statistical test(s) used AND whether they are one- or two-sided<br><i>Only common tests should be described solely by name; describe more complex techniques in the Methods section.</i>                                                               |
| <input checked="" type="checkbox"/> | <input type="checkbox"/>            | A description of all covariates tested                                                                                                                                                                                                                     |
| <input type="checkbox"/>            | <input checked="" type="checkbox"/> | A description of any assumptions or corrections, such as tests of normality and adjustment for multiple comparisons                                                                                                                                        |
| <input type="checkbox"/>            | <input checked="" type="checkbox"/> | A full description of the statistical parameters including central tendency (e.g. means) or other basic estimates (e.g. regression coefficient) AND variation (e.g. standard deviation) or associated estimates of uncertainty (e.g. confidence intervals) |
| <input type="checkbox"/>            | <input checked="" type="checkbox"/> | For null hypothesis testing, the test statistic (e.g. $F$ , $t$ , $r$ ) with confidence intervals, effect sizes, degrees of freedom and $P$ value noted<br><i>Give <math>P</math> values as exact values whenever suitable.</i>                            |
| <input checked="" type="checkbox"/> | <input type="checkbox"/>            | For Bayesian analysis, information on the choice of priors and Markov chain Monte Carlo settings                                                                                                                                                           |
| <input checked="" type="checkbox"/> | <input type="checkbox"/>            | For hierarchical and complex designs, identification of the appropriate level for tests and full reporting of outcomes                                                                                                                                     |
| <input checked="" type="checkbox"/> | <input type="checkbox"/>            | Estimates of effect sizes (e.g. Cohen's $d$ , Pearson's $r$ ), indicating how they were calculated                                                                                                                                                         |

*Our web collection on [statistics for biologists](#) contains articles on many of the points above.*

### Software and code

Policy information about [availability of computer code](#)

Data collection BD FACSDiva v9.0

Data analysis Commercial: FlowJo version 9.9.6 GraphPad Prism version 6.0, Open-source: R version 3.5.2, OpenCyto ([opencyto.org](https://opencyto.org)), VDJFasta (<https://github.com/immunoengineer/vdjfasta>), Seurat Pipeline (<https://satijalab.org/seurat/>). Published manuscripts for the above open-source software are included in the References of this study. Our data analysis workflow is available at: <https://github.com/seshadrilab> (DOI: 10.5281/zenodo.5542410).

For manuscripts utilizing custom algorithms or software that are central to the research but not yet described in published literature, software must be made available to editors and reviewers. We strongly encourage code deposition in a community repository (e.g. GitHub). See the Nature Research [guidelines for submitting code & software](#) for further information.

### Data

Policy information about [availability of data](#)

All manuscripts must include a [data availability statement](#). This statement should provide the following information, where applicable:

- Accession codes, unique identifiers, or web links for publicly available datasets
- A list of figures that have associated raw data
- A description of any restrictions on data availability

Raw data are published as Source Data of this manuscript and available on a GitHub repository (DOI: 10.5281/zenodo.5542410) . Public database IMGT was used to map TCR sequences and can be accessed here: <https://www.imgt.org/>

## Field-specific reporting

Please select the one below that is the best fit for your research. If you are not sure, read the appropriate sections before making your selection.

Life sciences  Behavioural & social sciences  Ecological, evolutionary & environmental sciences

For a reference copy of the document with all sections, see [nature.com/documents/nr-reporting-summary-flat.pdf](https://www.nature.com/documents/nr-reporting-summary-flat.pdf)

## Life sciences study design

All studies must disclose on these points even when the disclosure is negative.

|                 |                                                                                                                                                                                                                                                                                                                                              |
|-----------------|----------------------------------------------------------------------------------------------------------------------------------------------------------------------------------------------------------------------------------------------------------------------------------------------------------------------------------------------|
| Sample size     | No sample size calculation was performed. Sample size was selected based on previous cohort knowledge and data analysis plans.                                                                                                                                                                                                               |
| Data exclusions | No data were excluded from analysis. Pre-specified exclusion criteria were established, and no samples met specified thresholds for poor viability (CD3+ Event count < 10,000 cells or CD4 Event count < 3,000 cells).                                                                                                                       |
| Replication     | Number of biological and technical replicates are specified in figure legend, and all replicates where stated were successful. Data in Figures 1, 5, and 7 were not validated through biological or technical replicates due to sample limitations and cost of study and were instead validated through alternative experimental approaches. |
| Randomization   | Samples were not randomized into experimental batches as data included in Figure 1 as all samples were acquired in one batch (acquired on the same day with same flow cytometer parameters). No randomization or confounder control was required because each individual served as their own control (paired analyses).                      |
| Blinding        | Individual who acquired samples for Figure 1 was blinded to disease status group allocation and demographic information during sample preparation and data acquisition.                                                                                                                                                                      |

## Reporting for specific materials, systems and methods

We require information from authors about some types of materials, experimental systems and methods used in many studies. Here, indicate whether each material, system or method listed is relevant to your study. If you are not sure if a list item applies to your research, read the appropriate section before selecting a response.

### Materials & experimental systems

| n/a                                 | Involved in the study                                           |
|-------------------------------------|-----------------------------------------------------------------|
| <input type="checkbox"/>            | <input checked="" type="checkbox"/> Antibodies                  |
| <input type="checkbox"/>            | <input checked="" type="checkbox"/> Eukaryotic cell lines       |
| <input checked="" type="checkbox"/> | <input type="checkbox"/> Palaeontology and archaeology          |
| <input checked="" type="checkbox"/> | <input type="checkbox"/> Animals and other organisms            |
| <input type="checkbox"/>            | <input checked="" type="checkbox"/> Human research participants |
| <input checked="" type="checkbox"/> | <input type="checkbox"/> Clinical data                          |
| <input checked="" type="checkbox"/> | <input type="checkbox"/> Dual use research of concern           |

### Methods

| n/a                                 | Involved in the study                              |
|-------------------------------------|----------------------------------------------------|
| <input checked="" type="checkbox"/> | <input type="checkbox"/> ChIP-seq                  |
| <input type="checkbox"/>            | <input checked="" type="checkbox"/> Flow cytometry |
| <input checked="" type="checkbox"/> | <input type="checkbox"/> MRI-based neuroimaging    |

## Antibodies

| Antibodies used | Specificity | Purpose            | Fluorochrome | Clone    | Supplier          | Catalog Number | Dilution |
|-----------------|-------------|--------------------|--------------|----------|-------------------|----------------|----------|
|                 | CD3         | Lineage            | BUV395       | UCHT1    | BD Biosciences    | 563548         | 1:50     |
|                 | CD4         | Lineage            | APC H7       | 13B8.2   | BD Biosciences    | 560837         | 1:50     |
|                 | CD8β        | Lineage            | BB700        | 2ST8.5H7 | BD Biosciences    | 745761         | 1:10     |
|                 | CD45RA      | Memory             | BUV737       | HI100    | BD Biosciences    | 564442         | 1:500    |
|                 | CCR7        | Memory             | BV711        | 150503   | BD Biosciences    | 566602         | 1:100    |
|                 | Pan-γδ      | γδ T cells         | PE-Vio770    | 11F2     | Miltenyi Biotec   | 130-099-762    | 1:50     |
|                 | Vδ2         | Vγ9δ2 T cells      | AF700        | B6       | BioLegend         | 331416         | 1:100    |
|                 | TRAV1-2     | TCR Identification | BV605        | 3C10     | BioLegend         | 351720         | 1:25     |
|                 | CD14        | Exclusion          | V785         | M5E2     | BioLegend         | 301840         | 1:50     |
|                 | CD19        | Exclusion          | V785         | SJ25C1   | BioLegend         | 363028         | 1:50     |
|                 | Green Dead  |                    |              |          |                   |                |          |
|                 | Cell Stain  | Viability          | FITC         | N/A      | Life Technologies | L23101         | 1:1000   |
|                 | CD3         | Lineage            | ECD          | UCHT1    | Beckman Coulter   | IM2705U        | 1:50     |
|                 | CD4         | Lineage            | APC Ax750    | 13B8.2   | Beckman Coulter   | A94685         | 1:50     |
|                 | CD8a        | Lineage            | PerCP Cy5.5  | SK1      | BD Biosciences    | 341051         | 1:10     |
|                 | IFN-γ       | Th1                | V450         | B27      | BD Biosciences    | 560371         | 1:50     |
|                 | TNF         | Th1                | FITC         | MAb11    | BD Biosciences    | 554512         | 1:50     |

|                                    |                                 |              |            |                   |        |       |
|------------------------------------|---------------------------------|--------------|------------|-------------------|--------|-------|
| IL-2                               | Th1                             | PE           | MQ1-17H12  | BD Biosciences    | 559334 | 1:10  |
| IL-4                               | Th2                             | APC          | MP4-25D2   | BD Biosciences    | 554486 | 1:250 |
| CD154                              | CD4 Activation/<br>B cell help  | PE Cy5       | TRAP1      | BD Biosciences    | 555701 | 1:5   |
| CD107a<br>Aqua Live/<br>Dead Stain | Degranulation                   | PE Cy7       | H4A3       | BD Biosciences    | 561348 | 1:50  |
| mTCRBC                             | Viability                       | V510         | N/A        | Life Technologies | L34966 | 1:100 |
| CD28/CD49d                         | Exogenous TCR<br>Identification | APC          | H57597     | BD Biosciences    | 553174 | 1:50  |
|                                    | Activation                      | Unconjugated | Not Listed | BD Biosciences    | 347690 | 1:25  |

## Validation

All antibodies are titrated for optimal staining on human peripheral blood mononuclear cells (PBMC) prior to use to ensure reactivity and determine optimal staining volume. This information is included in Supplemental Table 2. Antibodies were validated for reactivity by comparing staining of antibodies in human PBMC to known staining patterns. anti-murine TCR beta chain constant region antibody is validated on Jurkat cell lines expressing a modified TCR that contains a murine TCR constant region. This reagent was validated by staining a cell line transduced with a TCR with a murine constant region.

## Eukaryotic cell lines

### Policy information about [cell lines](#)

|                                                                   |                                                                                                                                                                                                                                                                                                                                                                                                                                                                                                                                                                               |
|-------------------------------------------------------------------|-------------------------------------------------------------------------------------------------------------------------------------------------------------------------------------------------------------------------------------------------------------------------------------------------------------------------------------------------------------------------------------------------------------------------------------------------------------------------------------------------------------------------------------------------------------------------------|
| Cell line source(s)                                               | Jurkat cells were provided by Dr. Thomas Blankenstein (Max Delbrück Center for Molecular Medicine, Berlin, Germany). K562 cells were provided by Dr. D. Branch Moody (Brigham and Women's Hospital, Boston, MA). Lenti-X HEK 293T cells were purchased from Clontech (Mountain View, CA). Upon receipt, Jurkat and K562 cell lines were validated by flow cytometry for purity and expression of markers of interest. The original commercial source of the cell lines is unknown, and both Jurkat and K562 cell lines have been significantly modified prior to our receipt. |
| Authentication                                                    | No new cell lines are described in this study. Cells received from collaborators were validated only for expression of genes of interest using flow cytometry.                                                                                                                                                                                                                                                                                                                                                                                                                |
| Mycoplasma contamination                                          | Cell lines tested negative for Mycoplasma contamination on Nov 29, 2018 using an enzyme-based assay, and these cells were then cryopreserved and thawed to generate these data.                                                                                                                                                                                                                                                                                                                                                                                               |
| Commonly misidentified lines (See <a href="#">ICLAC</a> register) | Cell lines used in this study are not included in this register.                                                                                                                                                                                                                                                                                                                                                                                                                                                                                                              |

## Human research participants

### Policy information about [studies involving human research participants](#)

|                            |                                                                                                                                                                                                                                                                                                                                                                                                                                                                                                                                                                                                                                                      |
|----------------------------|------------------------------------------------------------------------------------------------------------------------------------------------------------------------------------------------------------------------------------------------------------------------------------------------------------------------------------------------------------------------------------------------------------------------------------------------------------------------------------------------------------------------------------------------------------------------------------------------------------------------------------------------------|
| Population characteristics | Age, sex and disease status is described for each South African adolescent sample in Supplemental Table 1. Demographic information is not available for U.S. healthy controls.                                                                                                                                                                                                                                                                                                                                                                                                                                                                       |
| Recruitment                | First, U.S. healthy controls were recruited and enrolled at the Seattle HIV Vaccine Trials Unit as part of a cohort of healthy adults used to provide blood samples for developing and testing new assays. Second, we studied a subset of 6363 South African adolescents that were enrolled into a study that aimed to determine the incidence and prevalence of tuberculosis infection and disease in South Africa. Adolescents were enrolled at eleven high schools in the Worcester region of the Western Cape of South Africa. Individuals self-selected to be enrolled in these studies, which may introduce bias from the population at large. |
| Ethics oversight           | The study protocols were approved by the IRBs of the University of Washington, the Fred Hutchinson Cancer Research Center, and the University of Cape Town. Written informed consent was obtained from all adult participants as well as from the parents and/or legal guardians of the adolescents who participated. In addition, written informed assent was obtained from the adolescents.                                                                                                                                                                                                                                                        |

Note that full information on the approval of the study protocol must also be provided in the manuscript.

## Flow Cytometry

### Plots

Confirm that:

- The axis labels state the marker and fluorochrome used (e.g. CD4-FITC).
- The axis scales are clearly visible. Include numbers along axes only for bottom left plot of group (a 'group' is an analysis of identical markers).
- All plots are contour plots with outliers or pseudocolor plots.
- A numerical value for number of cells or percentage (with statistics) is provided.

### Methodology

|                    |                                                                                                                               |
|--------------------|-------------------------------------------------------------------------------------------------------------------------------|
| Sample preparation | For ex vivo analysis of SGL-CD1b tetramer positive cells, we studied two cohorts of healthy participants. First, U.S. healthy |
|--------------------|-------------------------------------------------------------------------------------------------------------------------------|

controls were recruited and enrolled at the Seattle HIV Vaccine Trials Unit as part of a cohort of healthy adults who to provided blood samples for developing and testing new assays. Peripheral blood mononuclear cells (PBMC) were collected by leukapheresis from five HIV-seronegative individuals with a known T cell response to cytomegalovirus (CMV) were used here. We also utilized cryopreserved PBMC samples donated by adults with a new diagnosis of active tuberculosis also from the Worcester region of the Western Cape of South Africa.

Instrument

BD LSR Fortessa, BD FACS Aria II

Software

BD FACSDiva, FlowJo v9.9.6

Cell population abundance

Cell sorting population abundance is relevant to Figures 5, 7. Cell population abundance described in Supplemental Figure 1. Post-sort purity was not evaluated due to sorting into 96-well plate. Figure 1 also involved identification of low-frequency cells, and gating strategy and identification is detailed in Supplemental Figure 1 and Figure 1A. Representative plot is shown in Figure 1B.

Gating strategy

Gating strategy for ex vivo identification of antigen-specific T cells described in Supplemental Figure 1.

Tick this box to confirm that a figure exemplifying the gating strategy is provided in the Supplementary Information.
